# Supplementary material
Source: MDPI journal article supplement (https://www.mdpi.com/1424-2818/15/5/617)
Supplement: s1 [file s1]

**Table S8.** Cellular fatty composition (%) derived from FAME analysis of *Pseudomonas danubii* JDS02PS016<sup>T</sup> and the type strains of closely related *Pseudomonas* species.

| Fatty acid (%)                                         | 1     | 2     | 3     | 4    |
|--------------------------------------------------------|-------|-------|-------|------|
| C <sub>10:0</sub> 3-OH                                 | 4.17  | 3.65  | 4.19  | 5.0  |
| C <sub>12:0</sub>                                      | -     | 1.55  | 1.92  | 2.5  |
| C <sub>12:0</sub> 2-OH                                 | 6.29  | 5.04  | 4.53  | 5.6  |
| C <sub>12:0</sub> 3-OH                                 | 4.86  | 4.66  | 3.97  | 4.2  |
| Summed feature 3                                       | 27.84 | 24.18 | 29.65 | 35.7 |
| C <sub>16:0</sub>                                      | 30.93 | 36.43 | 20.19 | 31.5 |
| C <sub>17:0</sub> <i>cyclo</i>                         | 11.33 | 10.11 | 0.74  | 4.0  |
| C <sub>18:2</sub> <i>w6,9c</i> /C <sub>18:0</sub> ANTE | -     | -     | -     | 1.1  |
| Summed feature 8                                       | 10.22 | 11.91 | 32.34 | 8.3  |
| C <sub>18:00</sub>                                     | 1.01  | 0.91  | 1.25  | -    |

All strains were cultured on tryptone soy agar (TSA) and incubated at 28°C for 48h. Strains: 1. *Pseudomonas danubii* JDS02PS016<sup>T</sup>; 2. *Pseudomonas protegens* DSM 19095<sup>T</sup>; 3. *P. saponiphila* DSM 9751<sup>T</sup>; 4. *P. chlororaphis* subsp. *chlororaphis* CCUG 552 B<sup>T</sup>. Summed feature represents a set of more than one CFA that could not be resolved: summed feature 3 contained C<sub>16:1</sub> *ω7c* and/or C<sub>16:1</sub> *ω6c* and summed feature 8 contained C<sub>18:1</sub> *ω6c* and/or C<sub>18:1</sub> *ω7c*; –, not detectable.
