# Supplementary material
Source: MDPI journal article supplement (https://www.mdpi.com/1424-2818/15/5/617)
Supplement: s1 [file s1]

**Table S5:** Genomic indices among the studied strains

|         |                                                           | JDS02PS016T |       |       |         | JDS10PS014 |       |       |         | JDS08PS003 |       |       |         |
|---------|-----------------------------------------------------------|-------------|-------|-------|---------|------------|-------|-------|---------|------------|-------|-------|---------|
| Strains |                                                           | GGDC        | ANIb  | ANIm  | TETRA   | GGDC       | ANIb  | ANIm  | TETRA   | GGDC       | ANIb  | ANIm  | TETRA   |
| 1.      | <i>Pseudomonas danubii</i><br>JDS02PS016T<br>(CP116502.1) | *           | *     | *     | *       | 90.60      | 98.82 | 98.98 | 0.99993 | 55.80      | 93.38 | 94.42 | 0.99893 |
| 2.      | <i>Pseudomonas danubii</i><br>JDS10PS014 (XXX)            | 90.60       | 98.81 | 98.98 | 0.99993 | *          | *     | *     | *       | 55.80      | 93.32 | 94.43 | 0.99896 |
|         | <i>Pseudomonas</i> sp.<br>JDS08PS003                      | 55.80       | 93.38 | 94.42 | 0.99893 | 55.80      | 93.32 | 94.43 | 0.99896 | *          | *     | *     | *       |
| 3.      | <i>Pseudomonas protegens</i> FD6<br>(CP031396.1)          | 78.70       | 97.32 | 97.68 | 0.99983 | 79.00      | 97.32 | 97.69 | 0.99981 | 54.70      | 93.27 | 94.21 | 0.99852 |
| 4.      | <i>Pseudomonas protegens</i> 4<br>(LUUD01.1)              | 78.90       | 97.47 | 97.71 | 0.99983 | 78.70      | 97.46 | 97.70 | 0.99983 | 54.60      | 93.12 | 94.18 | 0.99848 |
| 5.      | <i>Pseudomonas protegens</i><br>12H11 (MOAP01.1)          | 89.50       | 98.53 | 98.85 | 0.99988 | 89.20      | 98.45 | 98.86 | 0.99987 | 56.00      | 93.66 | 94.44 | 0.99900 |
| 6.      | <i>Pseudomonas protegens</i><br>15H3 (MOAR01.1)           | 89.50       | 98.53 | 98.85 | 0.99988 | 89.30      | 98.45 | 98.86 | 0.99988 | 56.00      | 93.66 | 94.44 | 0.99900 |
| 7.      | <i>Pseudomonas protegens</i> 38G2<br>(MOAS01.1)           | 89.50       | 98.53 | 98.85 | 0.99988 | 89.20      | 98.45 | 98.86 | 0.99988 | 56.00      | 93.66 | 94.44 | 0.99901 |
| 8.      | <i>Pseudomonas protegens</i> MB-<br>090624 (QJRN01.1)     | 91.00       | 98.76 | 98.96 | 0.99992 | 91.00      | 98.82 | 98.98 | 0.99989 | 55.80      | 93.36 | 94.44 | 0.99901 |
| 9.      | <i>Pseudomonas protegens</i> MB-<br>090714 (QJRM01.1)     | 90.80       | 98.75 | 98.98 | 0.99993 | 90.80      | 98.72 | 99.00 | 0.99990 | 56.20      | 93.56 | 94.45 | 0.99890 |
| 10.     | <i>Pseudomonas protegens</i> 11<br>(LUUE01.1)             | 90.40       | 98.73 | 98.94 | 0.99967 | 90.40      | 98.73 | 98.93 | 0.99958 | 55.60      | 93.50 | 94.41 | 0.99858 |
| 11.     | <i>Pseudomonas</i> sp. WS 5414<br>(JAAQWZ01.1)            | 99.80       | 99.96 | 99.97 | 0.99998 | 90.60      | 98.79 | 98.99 | 0.99992 | 55.70      | 93.33 | 94.43 | 0.99890 |
| 12.     | <i>Pseudomonas</i> sp.<br>JDS08PS003 (xx)                 | 55.80       | 93.60 | 94.42 | 0.99893 | 55.80      | 93.72 | 94.42 | 0.99896 | *          | *     | *     | *       |
| 13.     | <i>Pseudomonas protegens</i> 14B2<br>(MOAK01.1)           | 54.60       | 93.40 | 94.02 | 0.99899 | 54.80      | 93.44 | 94.03 | 0.99897 | 61.90      | 94.56 | 95.21 | 0.99941 |
| 14.     | <i>Pseudomonas protegens</i><br>CHAOT (XXX)               | 39.10       | 89.22 | 90.48 | 0.99320 | 39.20      | 89.25 | 90.48 | 0.99285 | 39.50      | 89.53 | 90.56 | 0.99071 |

|     |                                                                                 |       |       |       |         |       |       |       |         |       |       |       |         |
|-----|---------------------------------------------------------------------------------|-------|-------|-------|---------|-------|-------|-------|---------|-------|-------|-------|---------|
| 15. | <i>Pseudomonas saponiphila</i><br>DSM 9751T<br>(FNTJ01.1)                       | 41.70 | 89.87 | 91.17 | 0.99518 | 41.70 | 90.02 | 91.19 | 0.99515 | 39.90 | 89.20 | 90.66 | 0.99310 |
| 16. | <i>Pseudomonas</i> sp. Os17<br>(AP014627.1)                                     | 43.00 | 90.65 | 91.61 | 0.99568 | 42.90 | 90.69 | 91.62 | 0.99555 | 40.90 | 89.62 | 91.03 | 0.99291 |
| 17. | <i>Pseudomonas</i> sp. St29<br>(AP014628.1)                                     | 43.40 | 90.58 | 91.70 | 0.99593 | 43.30 | 90.60 | 91.71 | 0.99578 | 40.90 | 89.62 | 91.01 | 0.99311 |
| 18. | " <i>Pseudomonas aestus</i> "<br>CMAA1215T<br>(AVOY01.1)                        | 31.30 | 85.29 | 87.82 | 0.97524 | 31.20 | 85.25 | 87.82 | 0.97498 | 30.90 | 85.14 | 87.74 | 0.97249 |
| 19. | <i>Pseudomonas piscis</i><br>WHUV01.1.fsa nt                                    | 31.40 | 85.55 | 87.82 | 0.97651 | 31.30 | 85.53 | 87.80 | 0.97623 | 31.20 | 85.55 | 87.69 | 0.97372 |
| 20. | <i>Pseudomonas sessilinigenes</i><br>CMR12aT<br>(CP077074.1)                    | 31.10 | 85.36 | 87.70 | 0.97771 | 31.00 | 85.30 | 87.69 | 0.97757 | 30.90 | 85.29 | 87.56 | 0.97668 |
| 21. | <i>P. chlororaphis</i> subsp.<br><i>chlororaphis</i> DSM<br>50083T (CP027712.1) | 28.60 | 83.43 | 87.20 | 0.98680 | 28.60 | 83.39 | 87.20 | 0.98646 | 28.40 | 83.14 | 87.11 | 0.98322 |
| 22. | <i>P. chlororaphis</i> subsp.<br><i>aurantiaca</i> DSM 19603<br>(CP027746.1)    | 28.60 | 83.61 | 87.23 | 0.98689 | 28.60 | 83.45 | 87.22 | 0.98653 | 28.50 | 83.21 | 87.09 | 0.98346 |
| 23. | <i>P. chlororaphis</i> subsp.<br><i>aureofaciens</i> DSM 6698<br>(CP027720.1)   | 28.80 | 83.43 | 87.25 | 0.98607 | 28.80 | 83.43 | 87.26 | 0.98570 | 28.70 | 83.23 | 87.16 | 0.98244 |
| 24. | <i>P. chlororaphis</i> subsp.<br><i>piscium</i> DSM 21509<br>(CP027707.1)       | 28.50 | 83.44 | 87.15 | 0.98638 | 28.60 | 83.42 | 87.14 | 0.98598 | 28.30 | 83.11 | 87.06 | 0.98328 |
