# Supplementary material
Source: MDPI journal article supplement (https://www.mdpi.com/1424-2818/15/5/617)
Supplement: s1 [file s1]

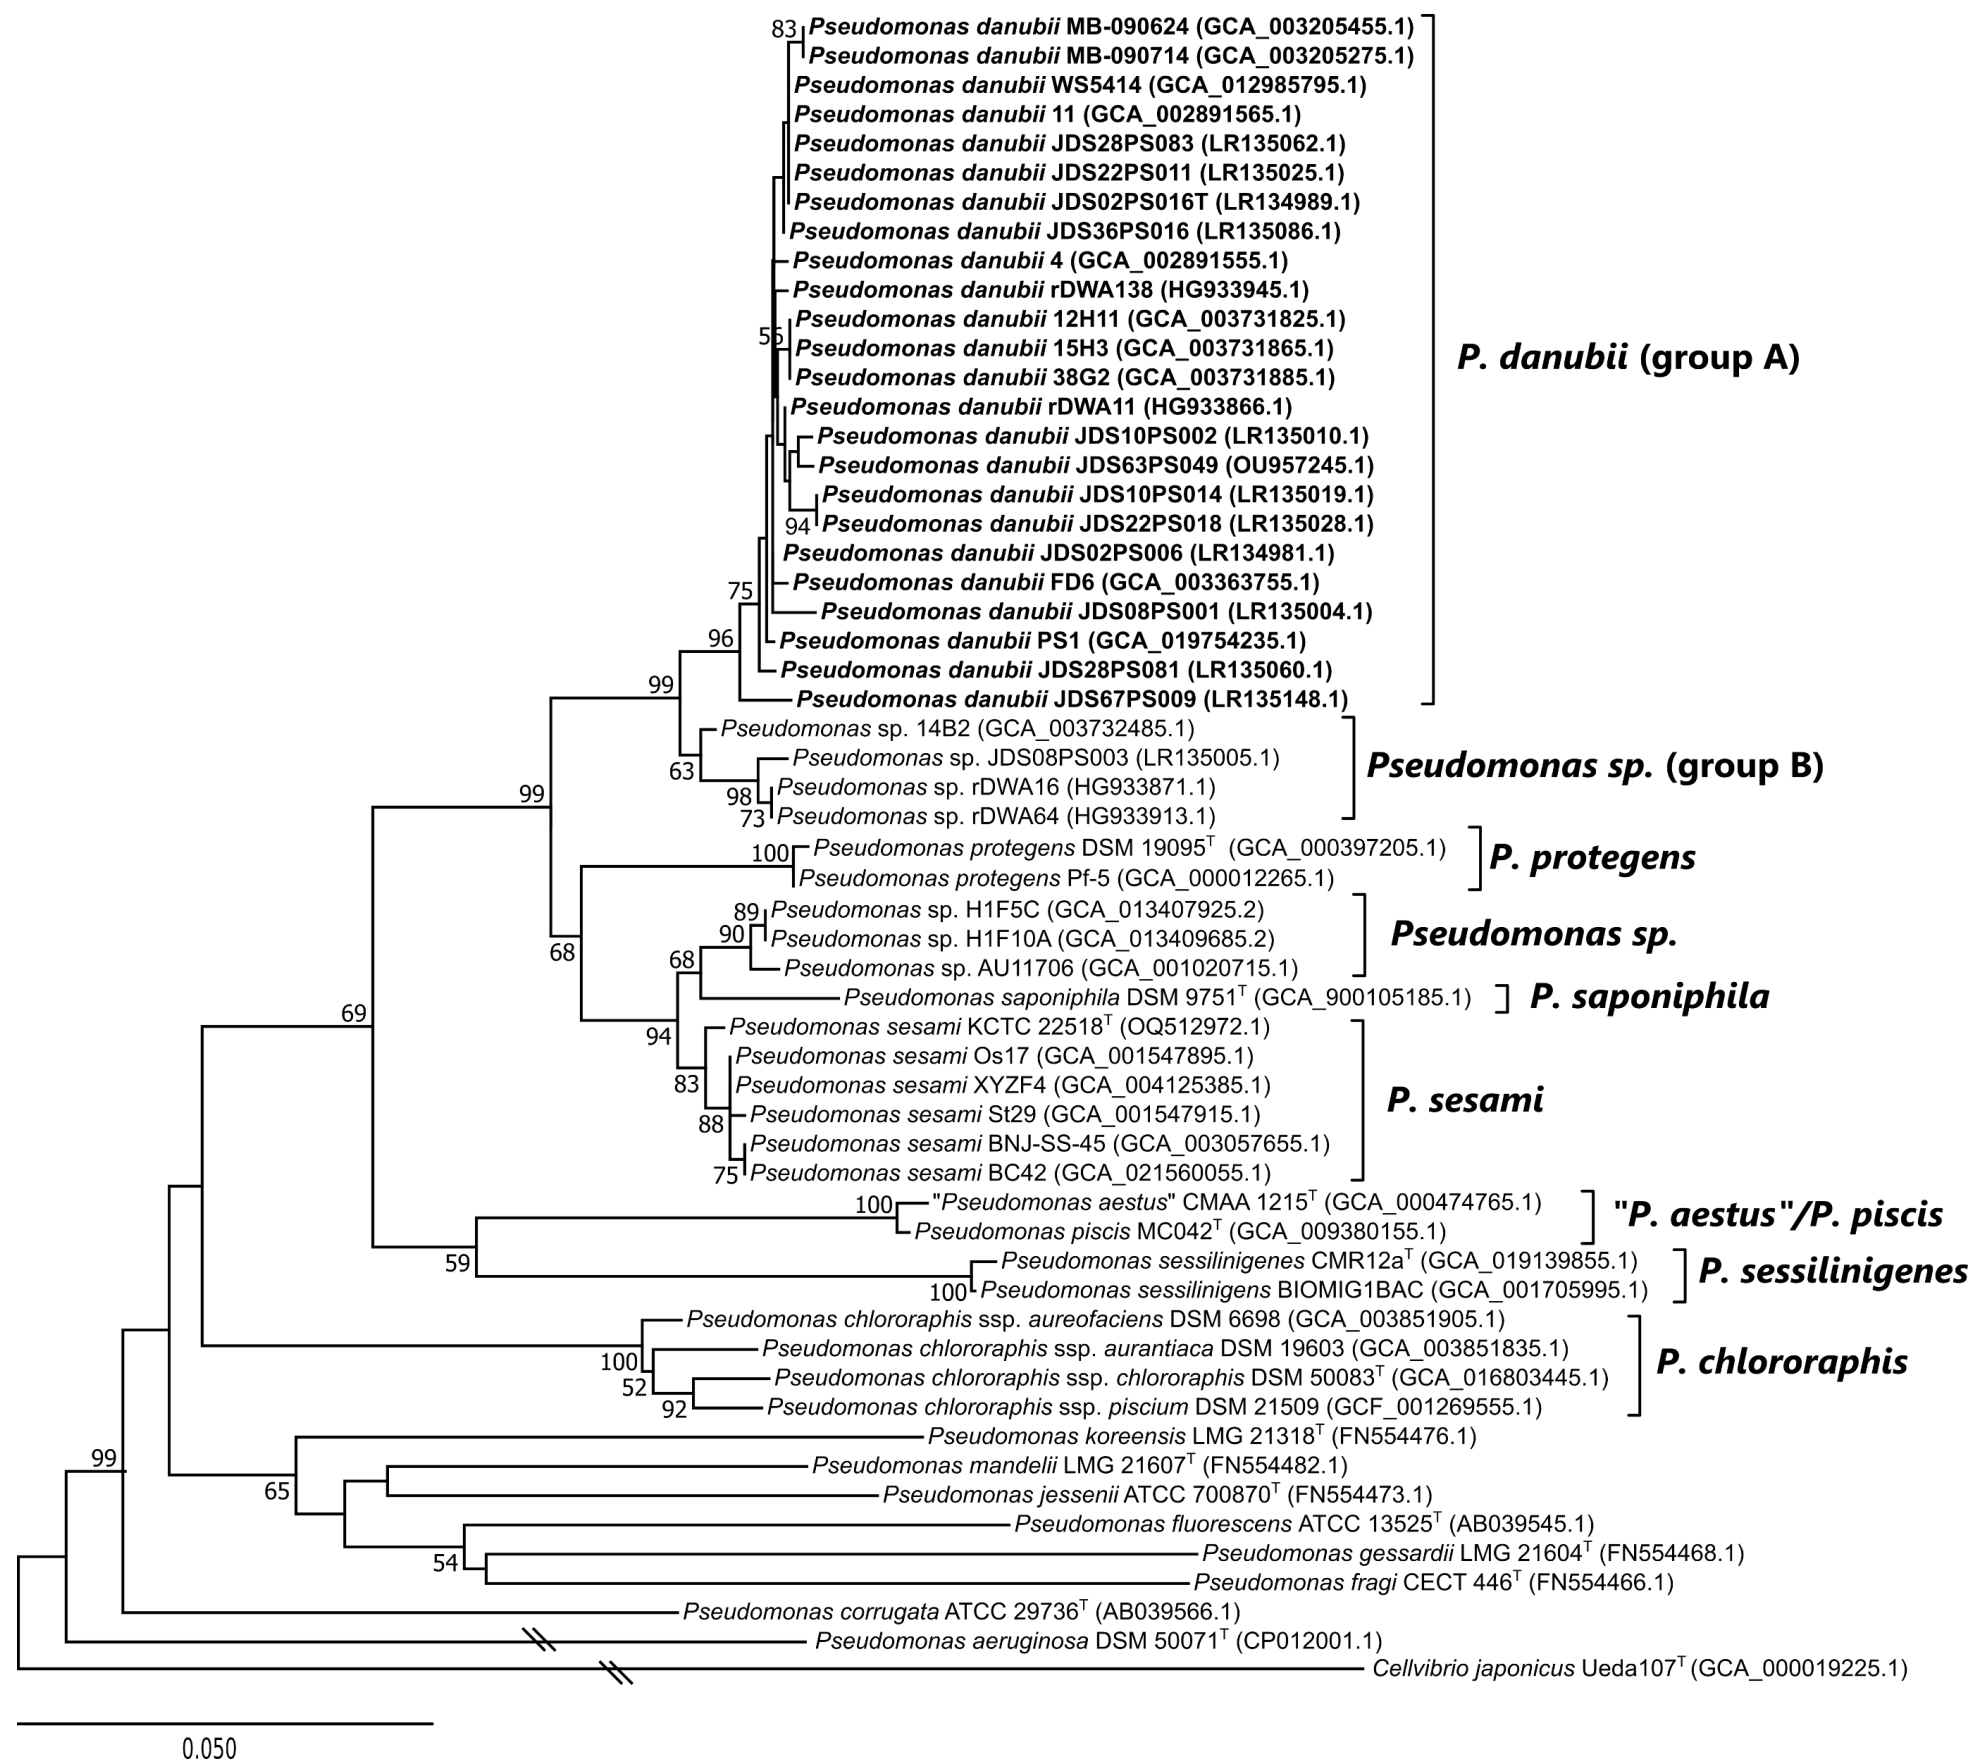

**Figure S1.** Phylogenetic tree based on the *rpoD* gene sequence (Jukes-Cantor, Maximum Likelihood). Bootstrap values higher than 50 are indicated in the nodes. Bar indicates sequence divergence. Strains assigned to the new species *P. danubii* are highlighted in bold.

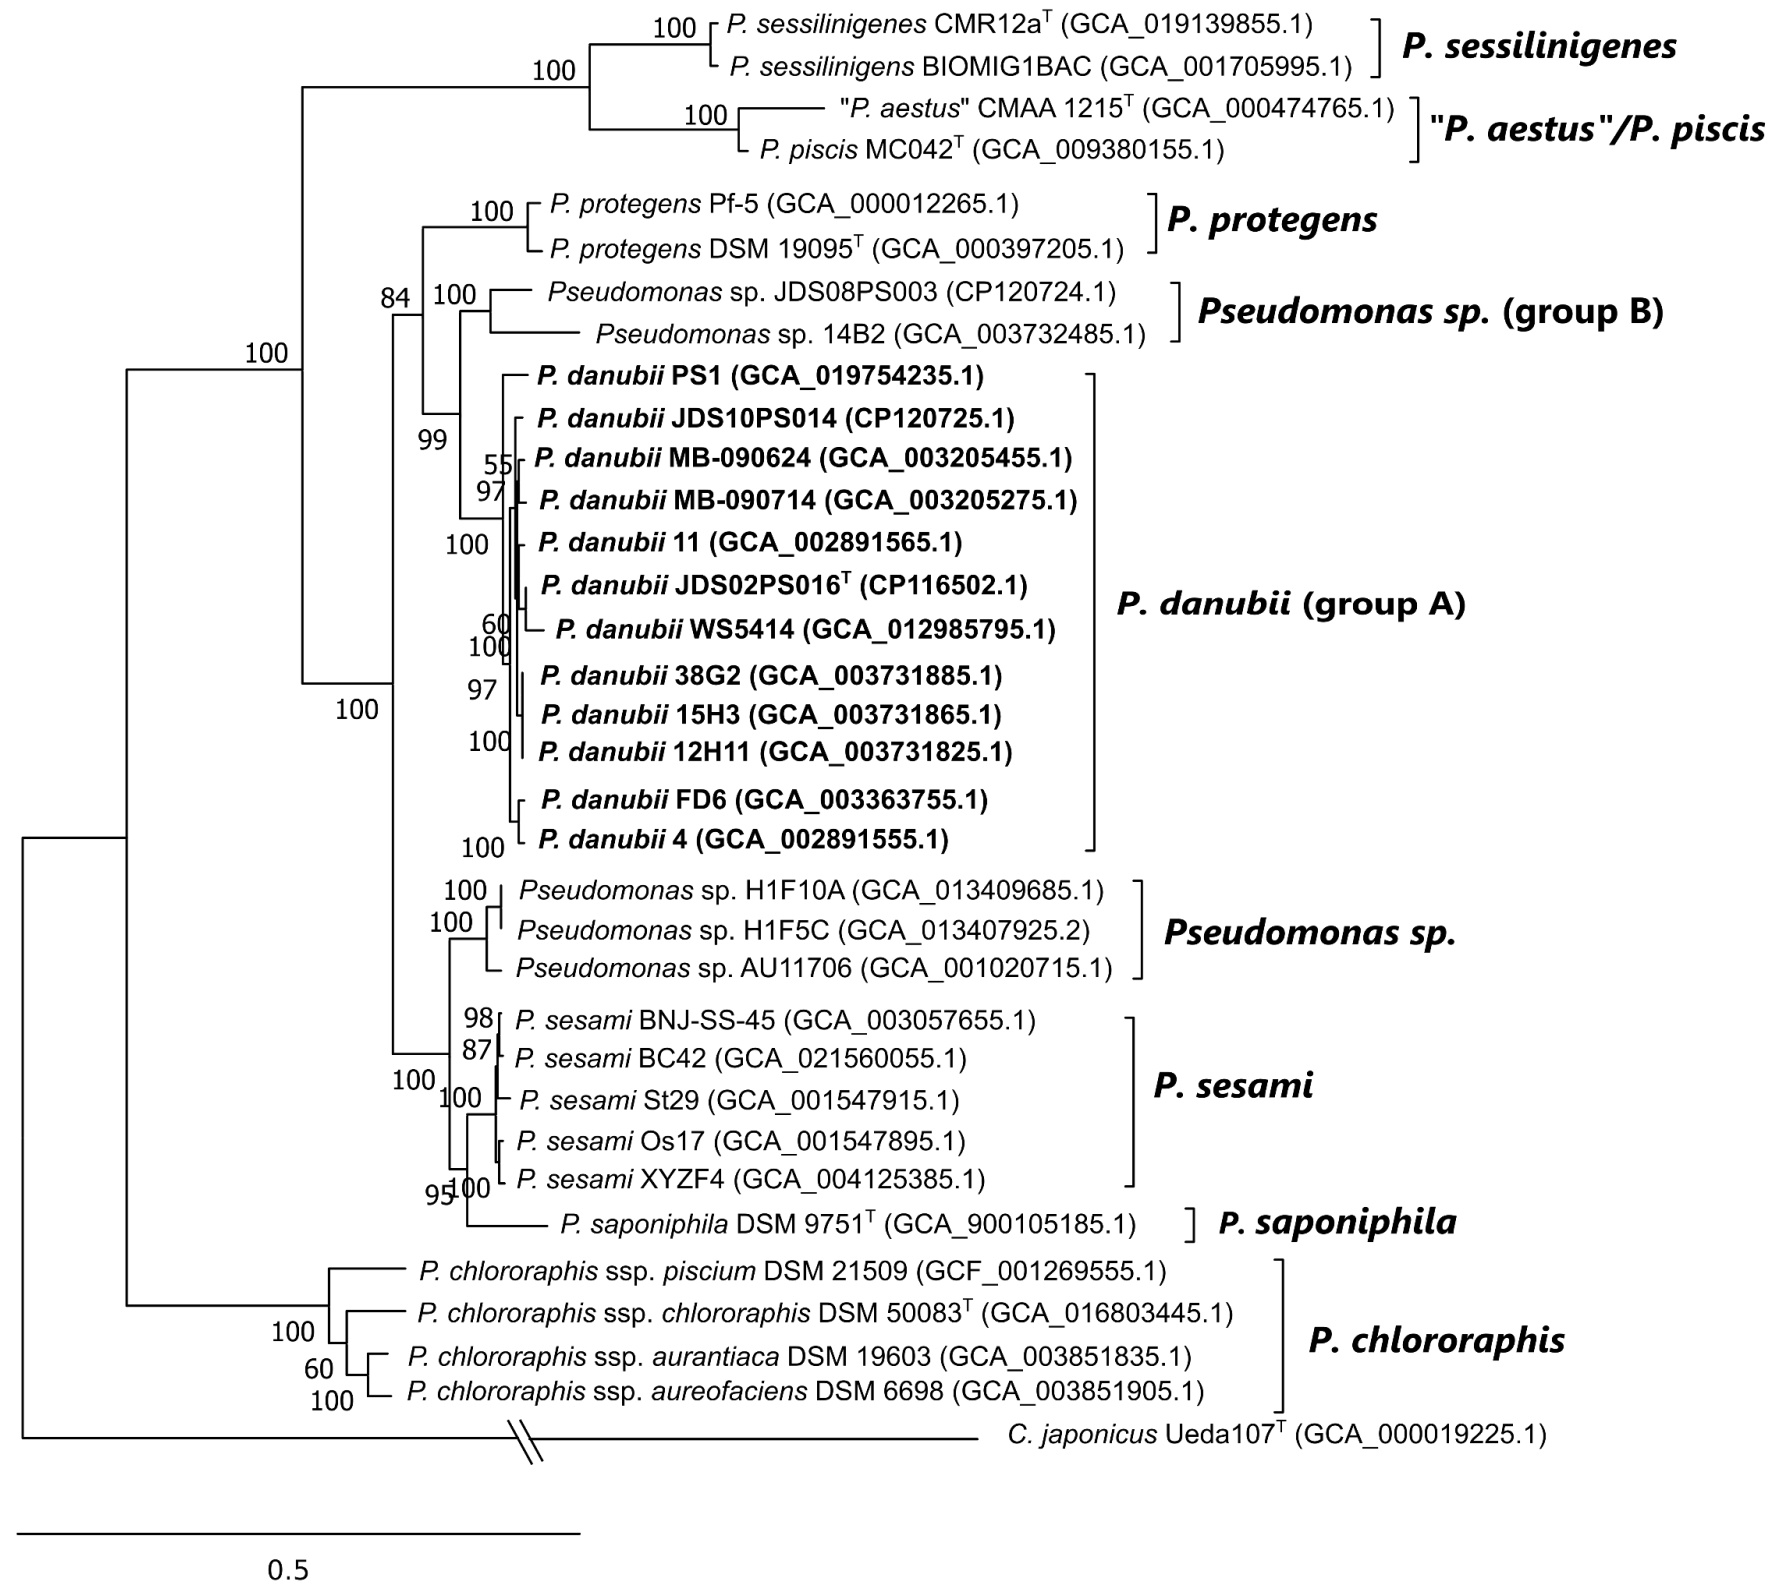

**Figure S2.** Maximum likelihood phylogenetic tree of strains studied in the *P. chlororaphis* subgroup of species based on the concatenated sequences of 249 core genes. *C. japonicum* was used as an outgroup. Numbers at the nodes indicate bootstrap values from 100 replicates. The bar indicates sequence divergence. Strains assigned to the new species *P. danubii* are highlighted in bold.

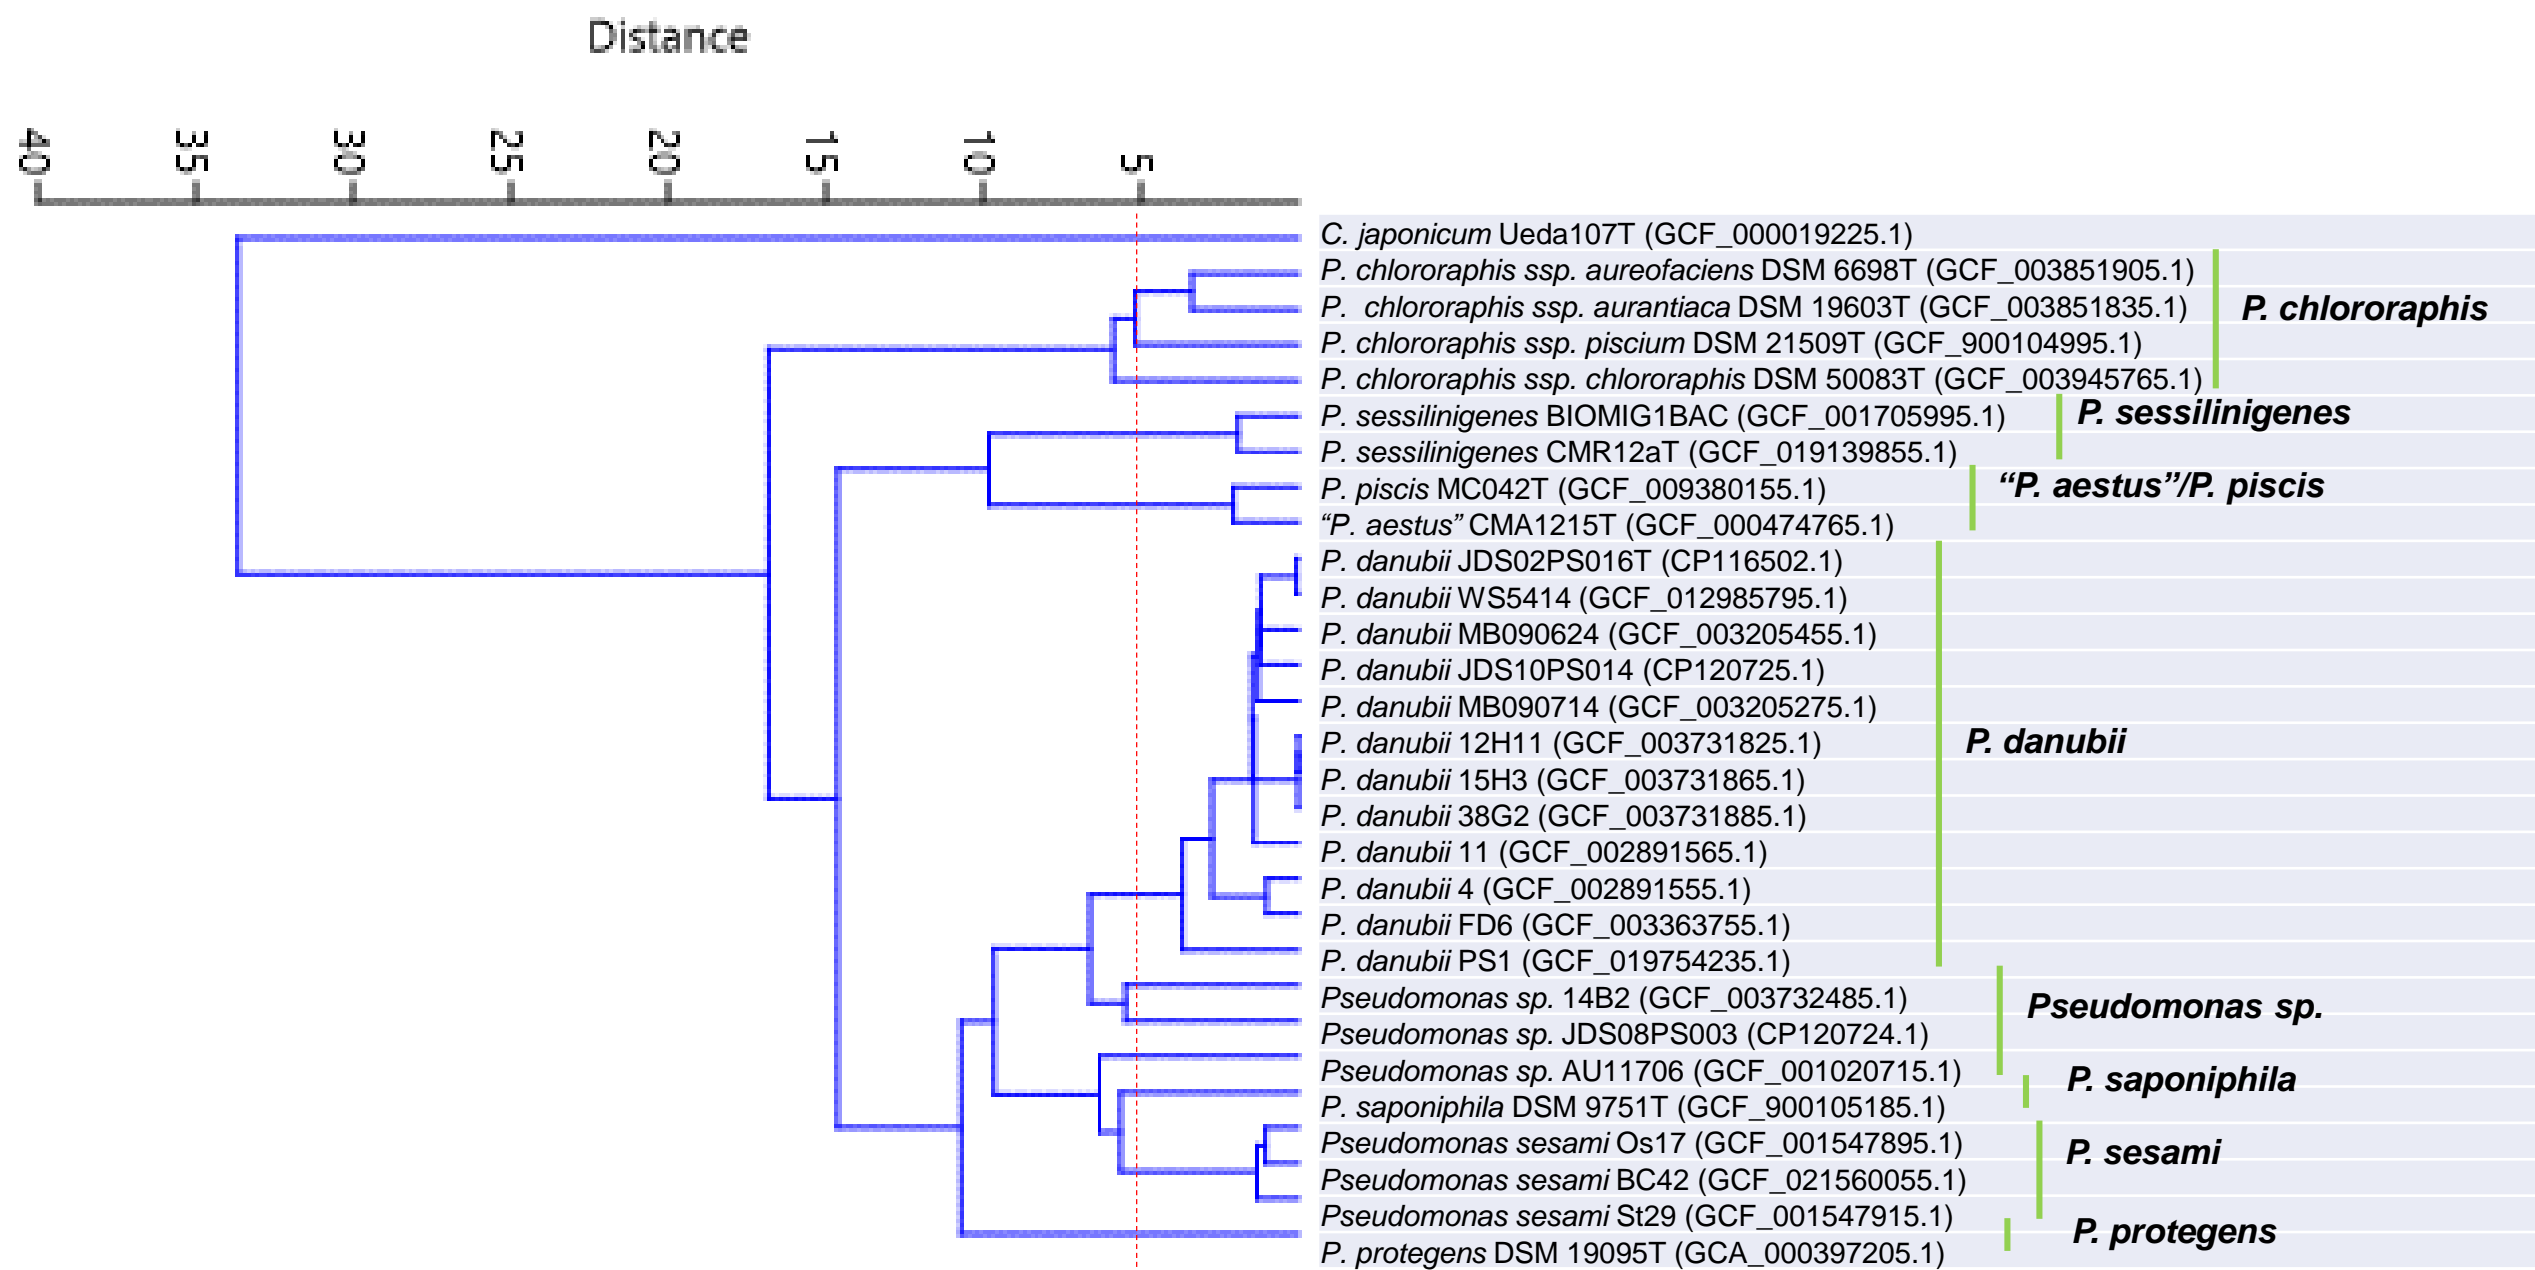

**Figure S3. a)** Dendrograms of the aggregated ANIb values. The dotted line indicates the 95% species threshold.

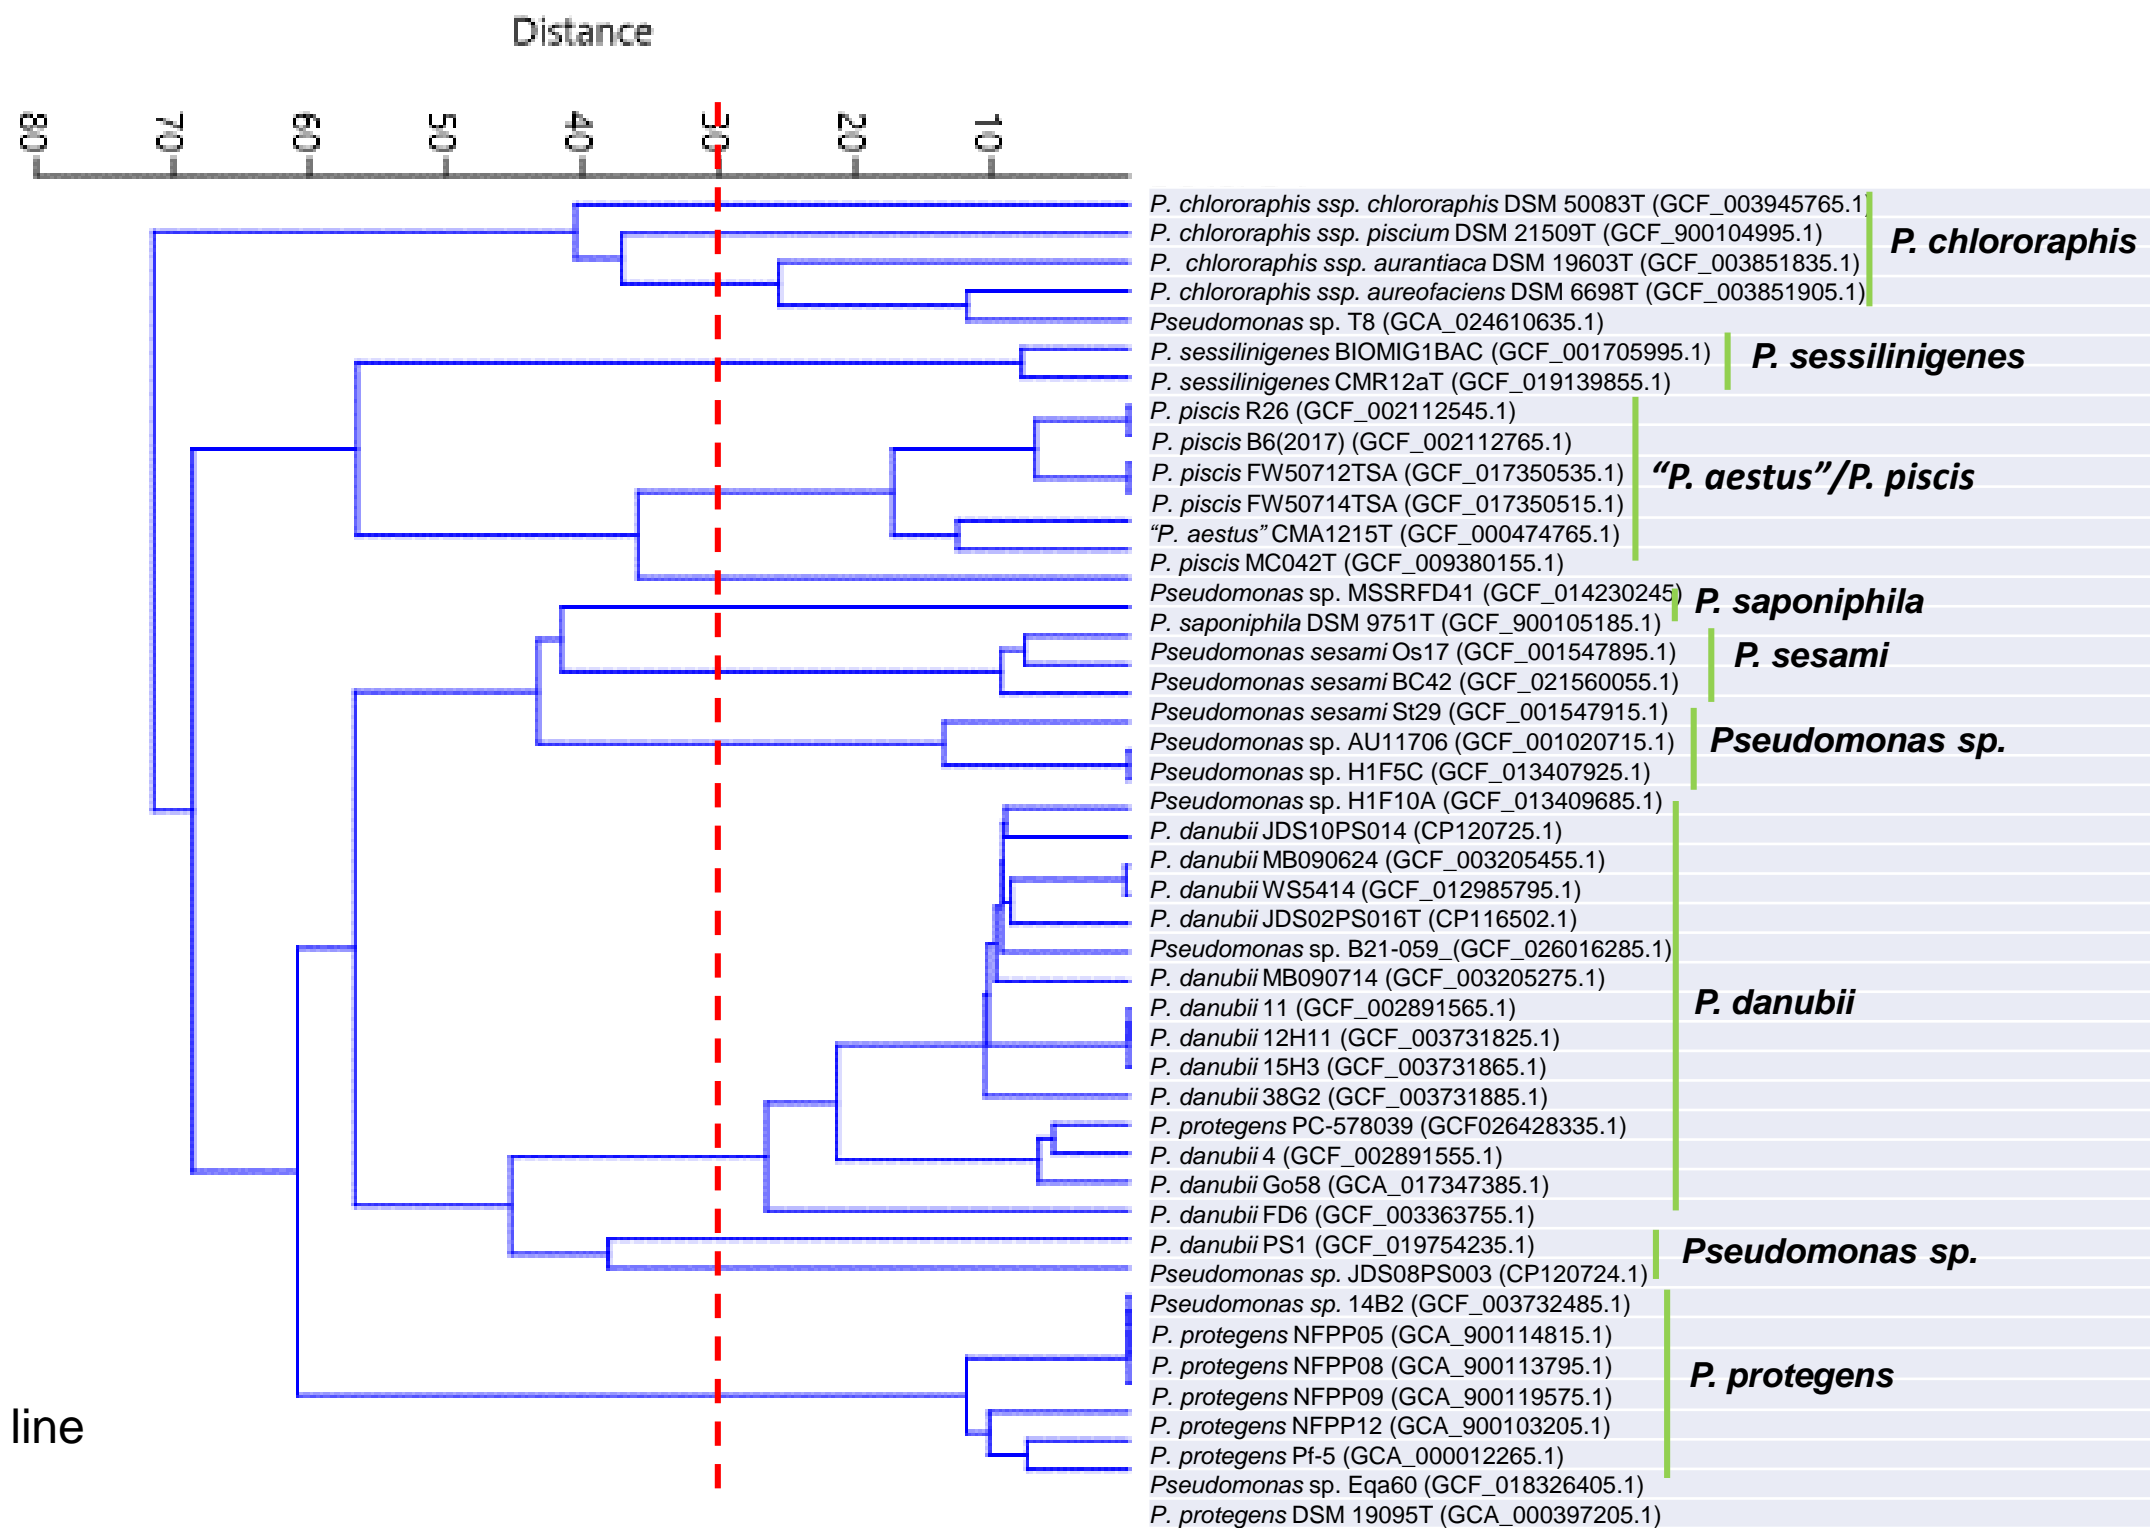

**Figure S3. b)**  
Dendrogram of the  
GGDC similarities  
among the studied  
strains. The dotted line  
indicates the 70%  
species threshold.

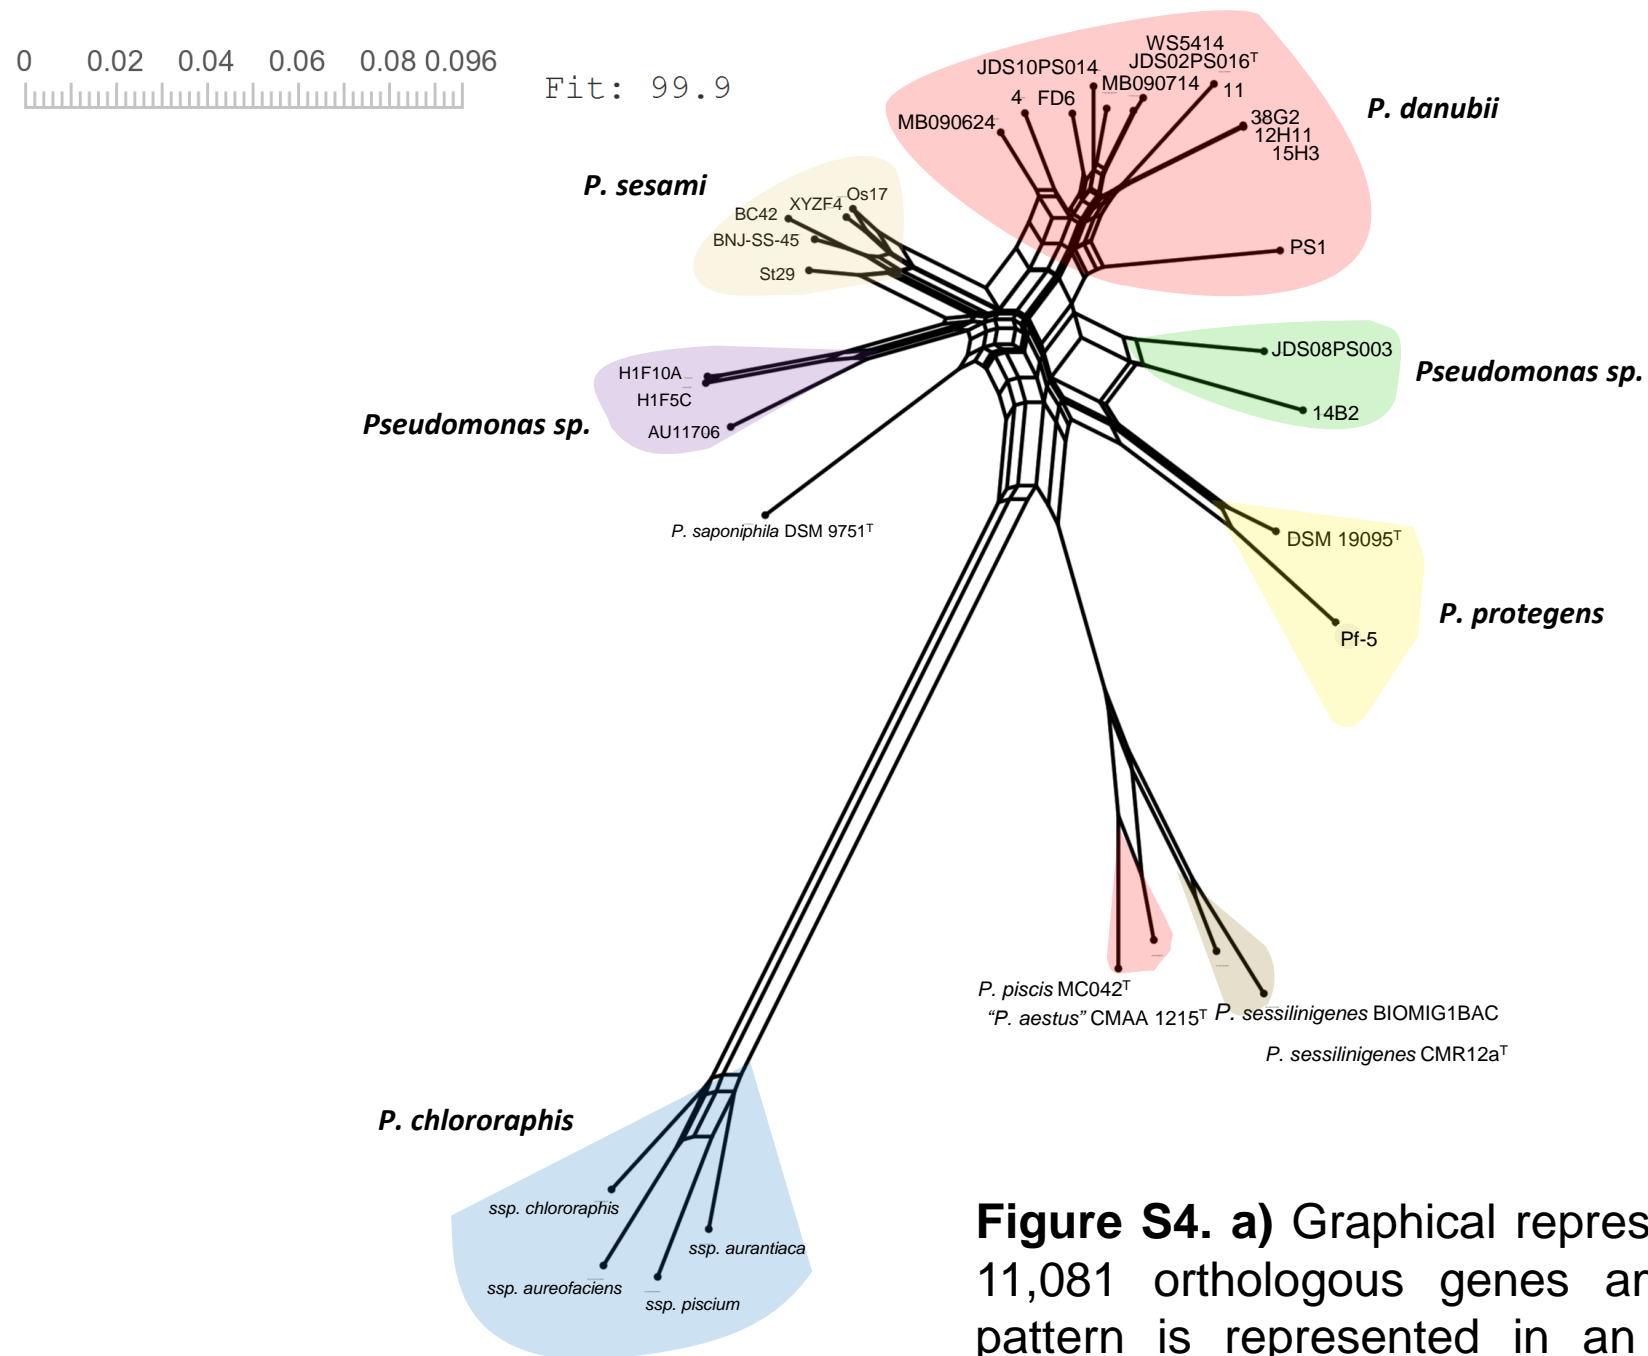

**Figure S4. a)** Graphical representation of the distribution of the 11,081 orthologous genes among the strains: The phyletic pattern is represented in an unrooted network by the split decomposition method. Strains of the same genomic species are grouped.

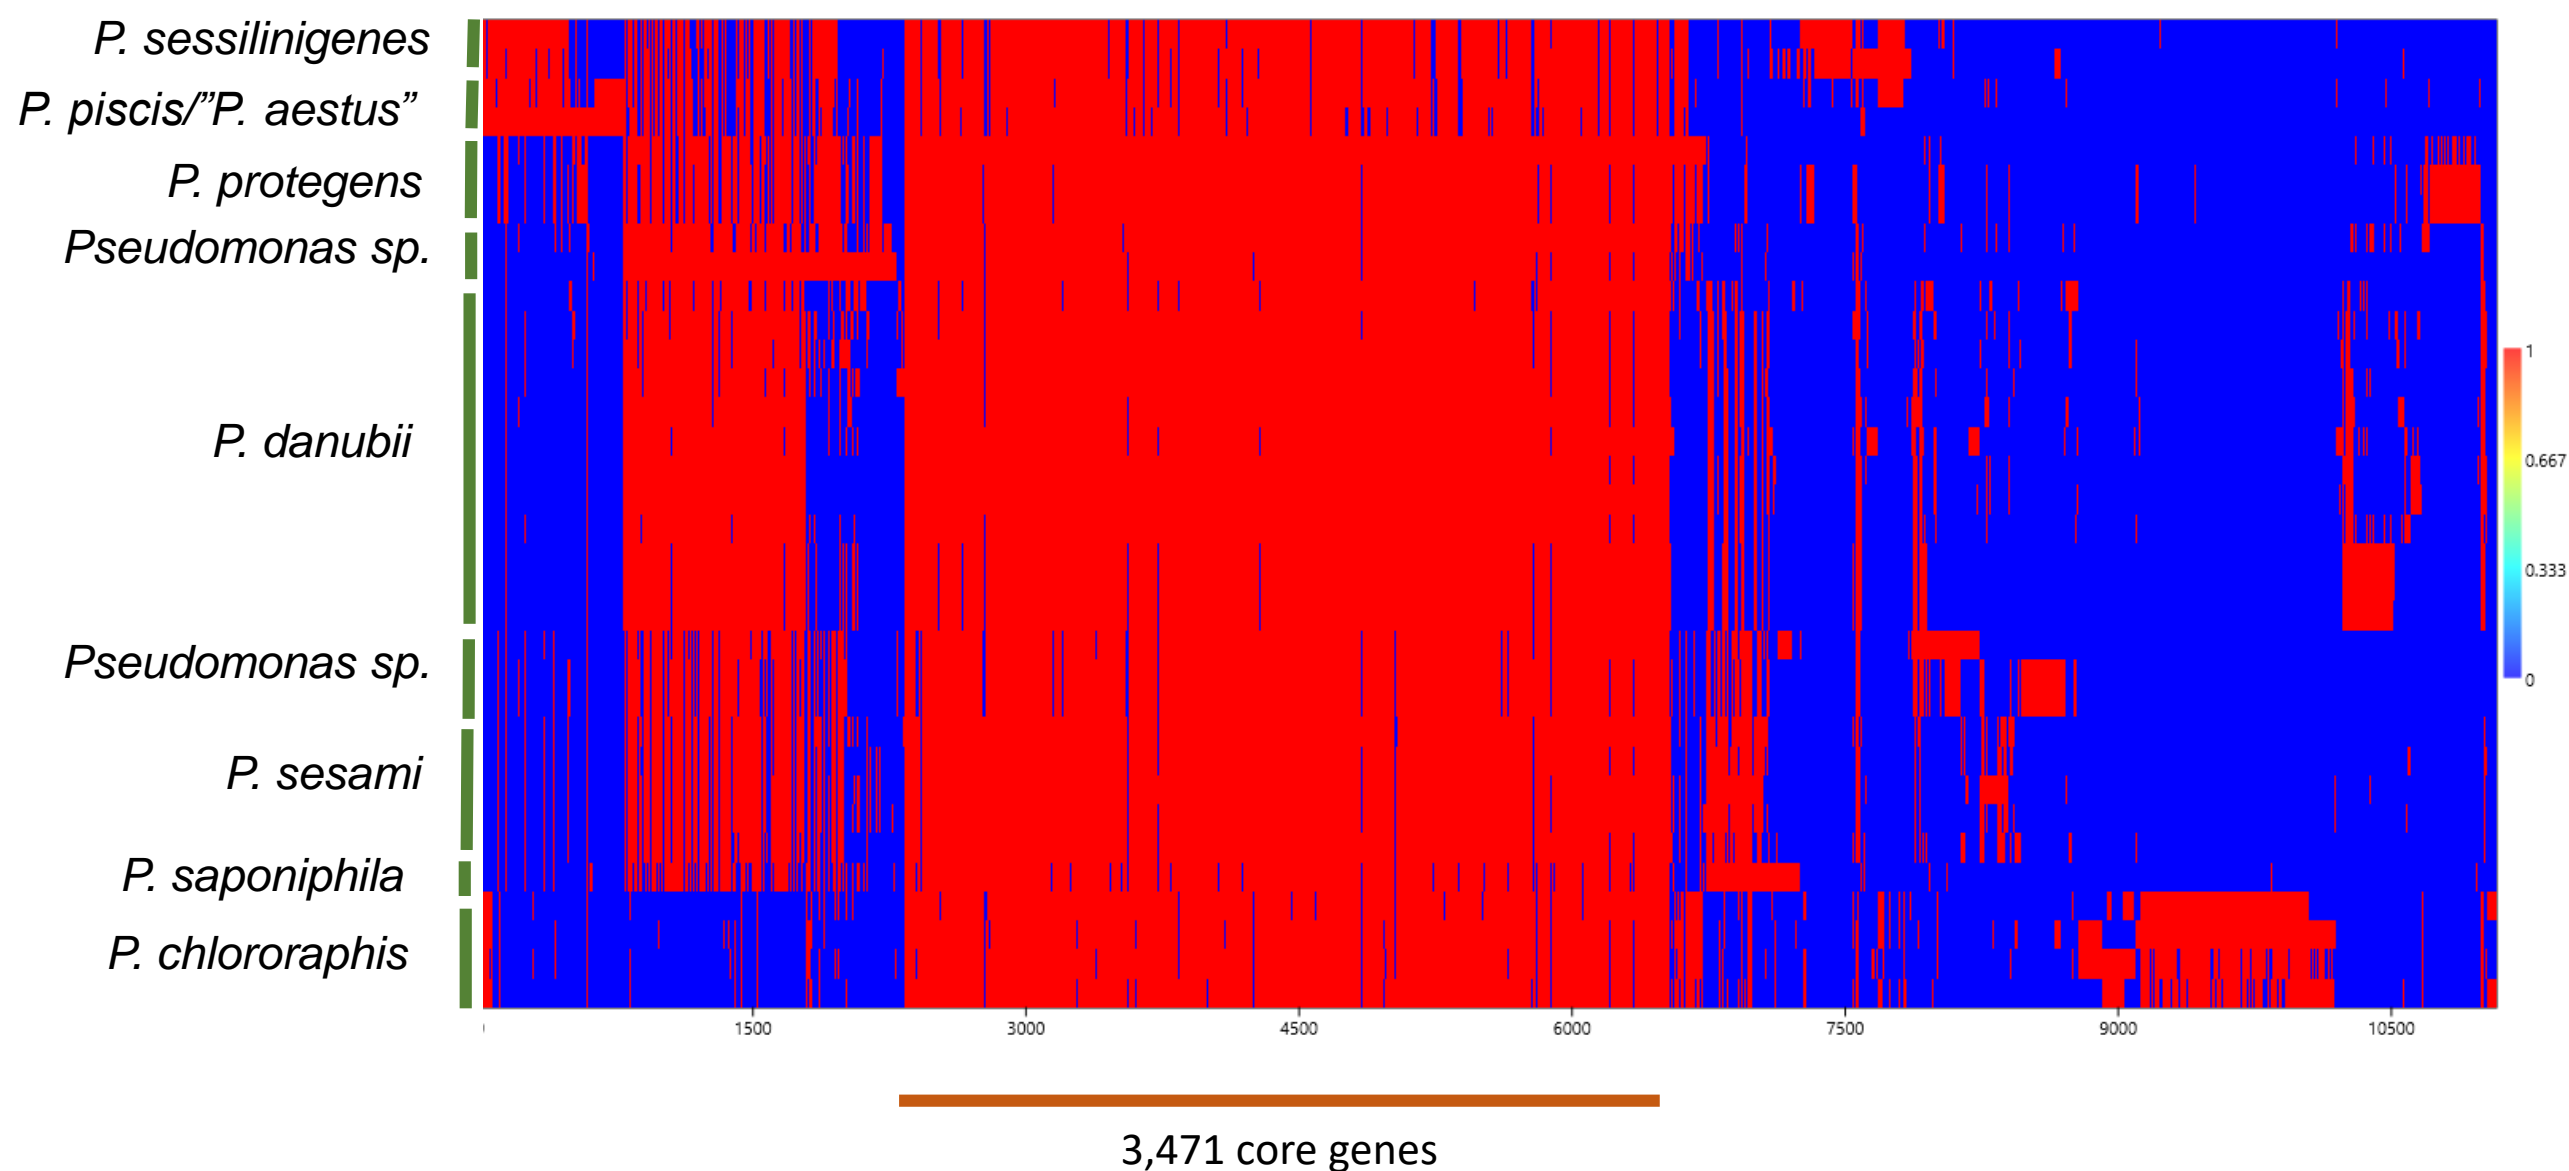

**Figure S4. b)** Graphical representation of the distribution of the 11,081 orthologous genes among the strains: Heat plot of the phyletic pattern representing the presence (red) or absence (blue) of the orthologous genes.

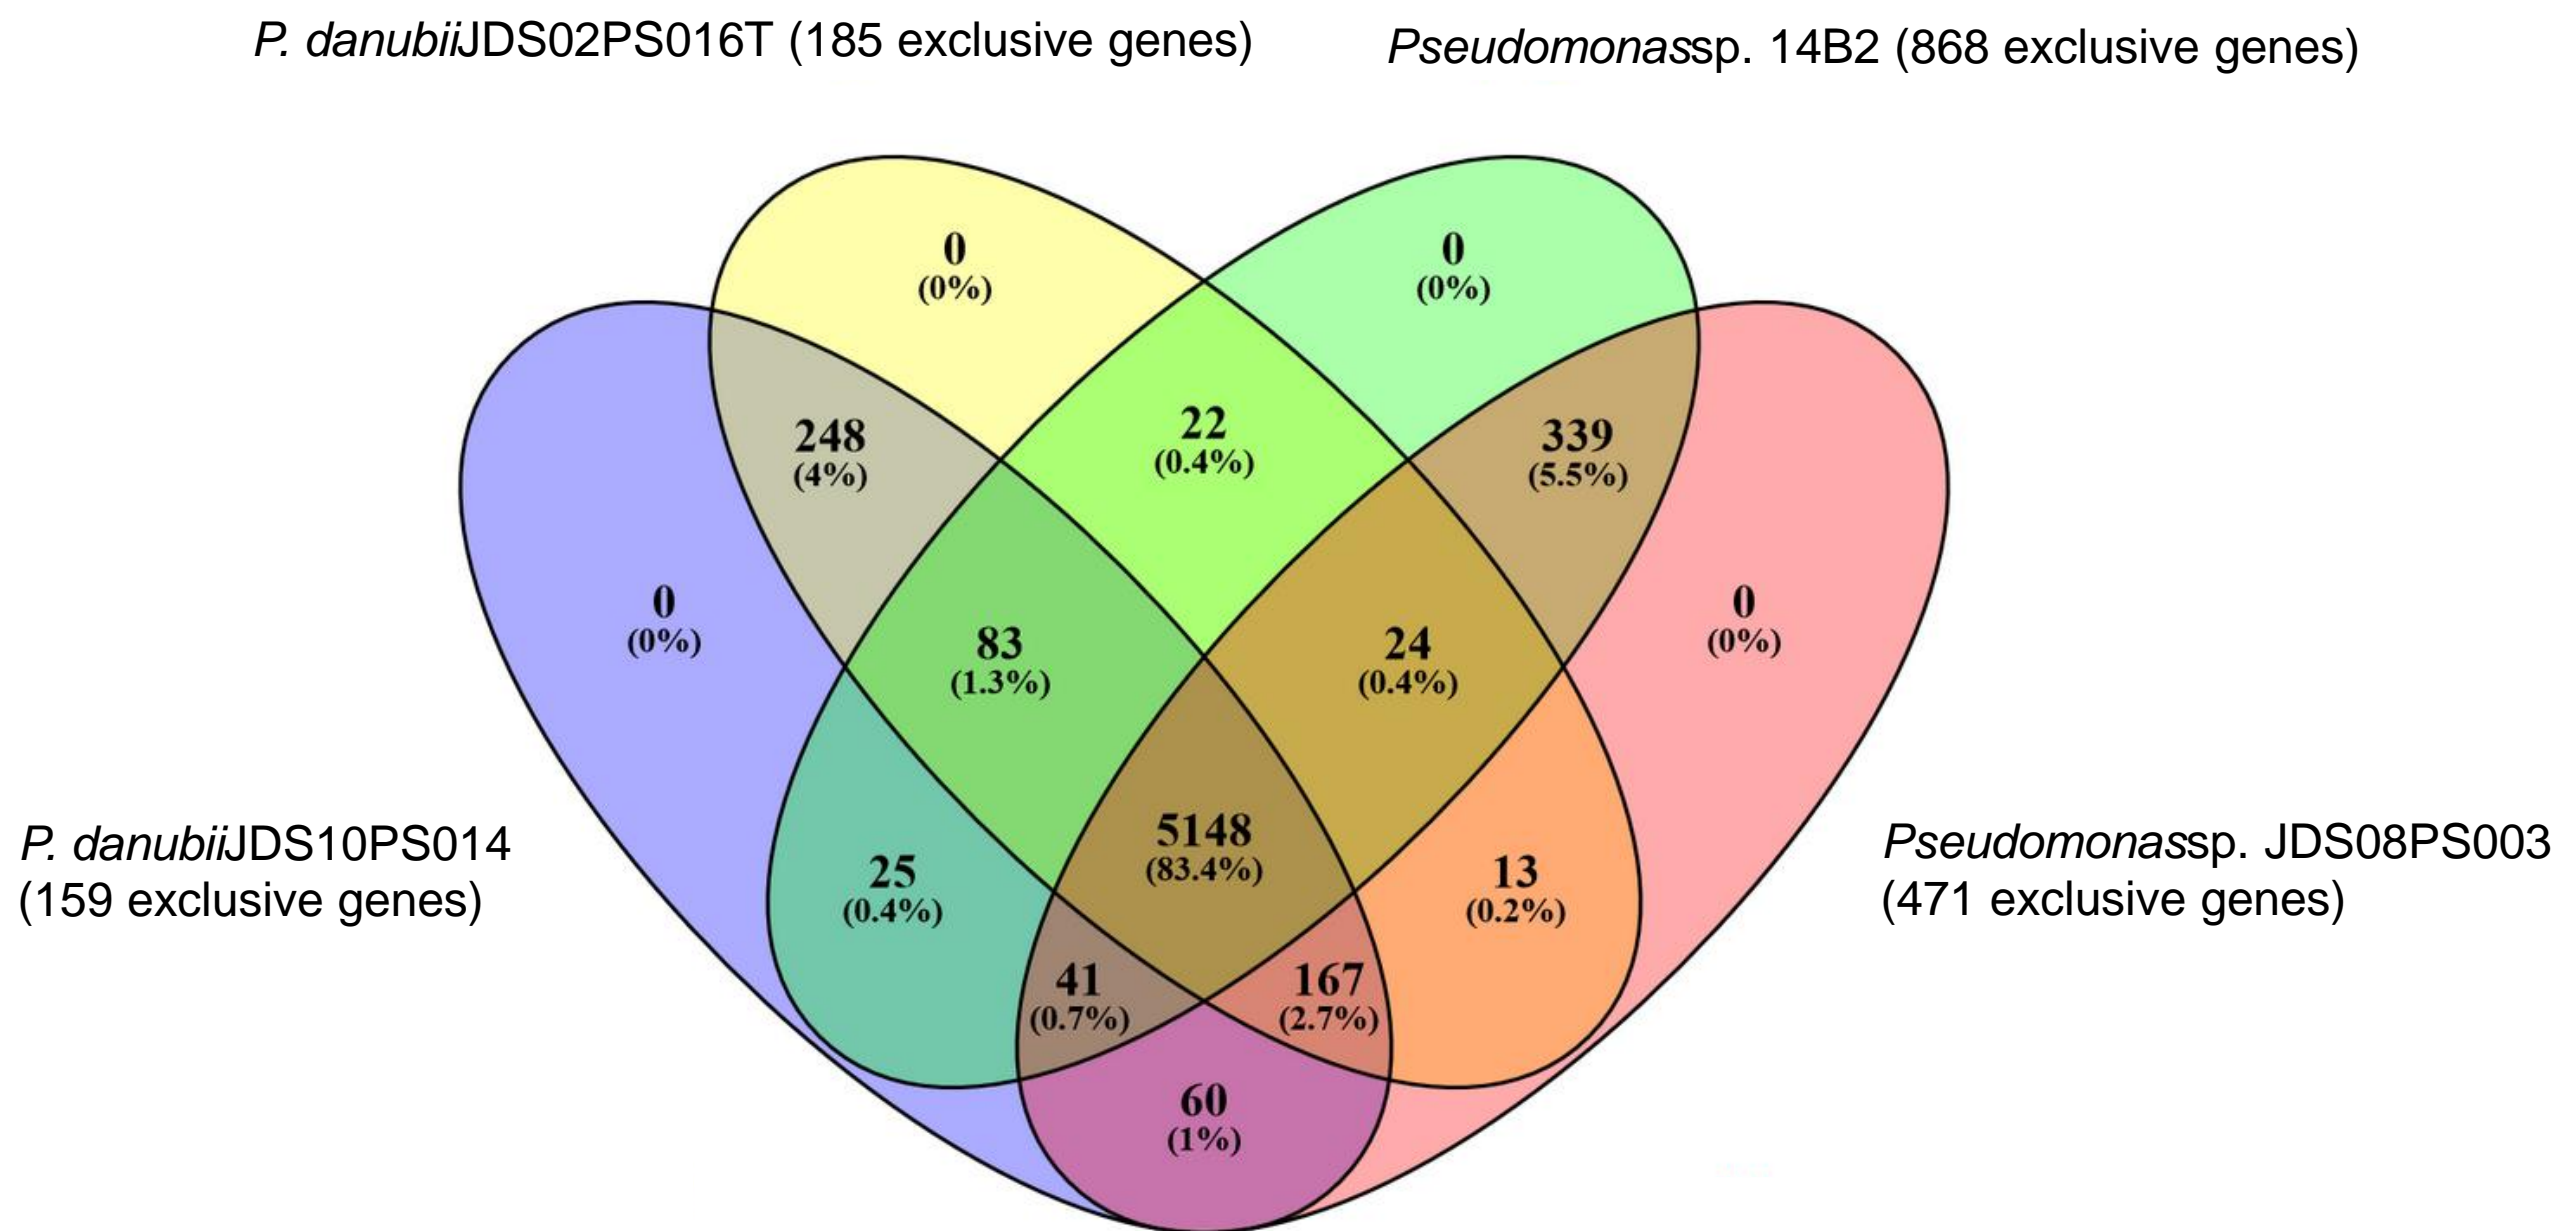

**Figure S5.** Venn diagram of the shared orthologous genes of two sequenced strains of *P. danubii* (JDS02PS016T and JDS10PS014) and two closely related strains of *Pseudomonas*\_E protegens\_B in the GTDB taxonomy (JDS08PS003 and 14B2).



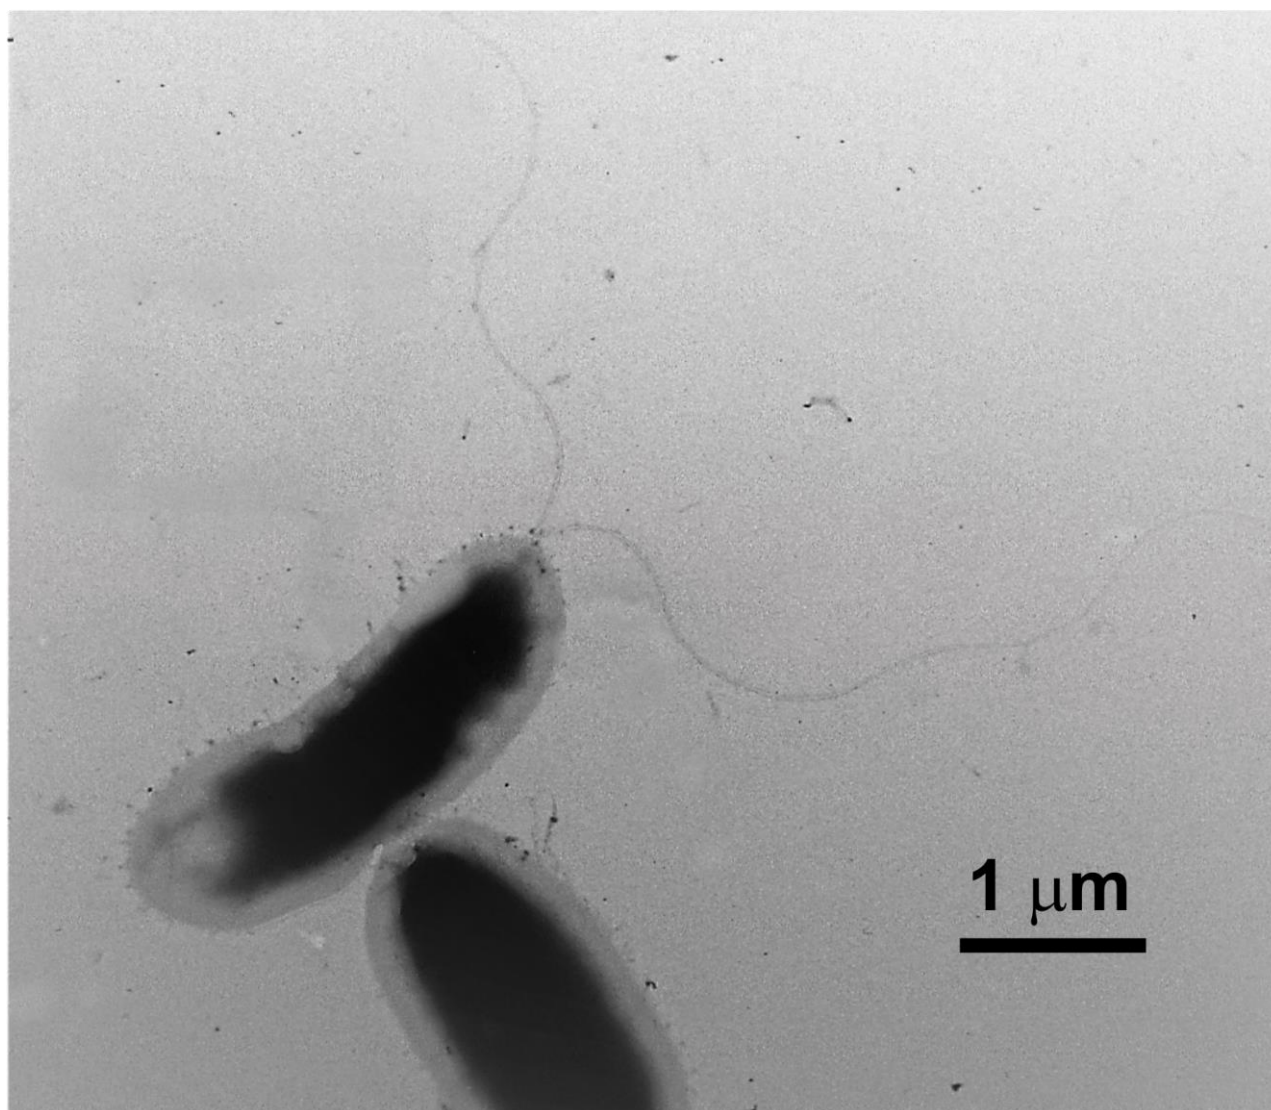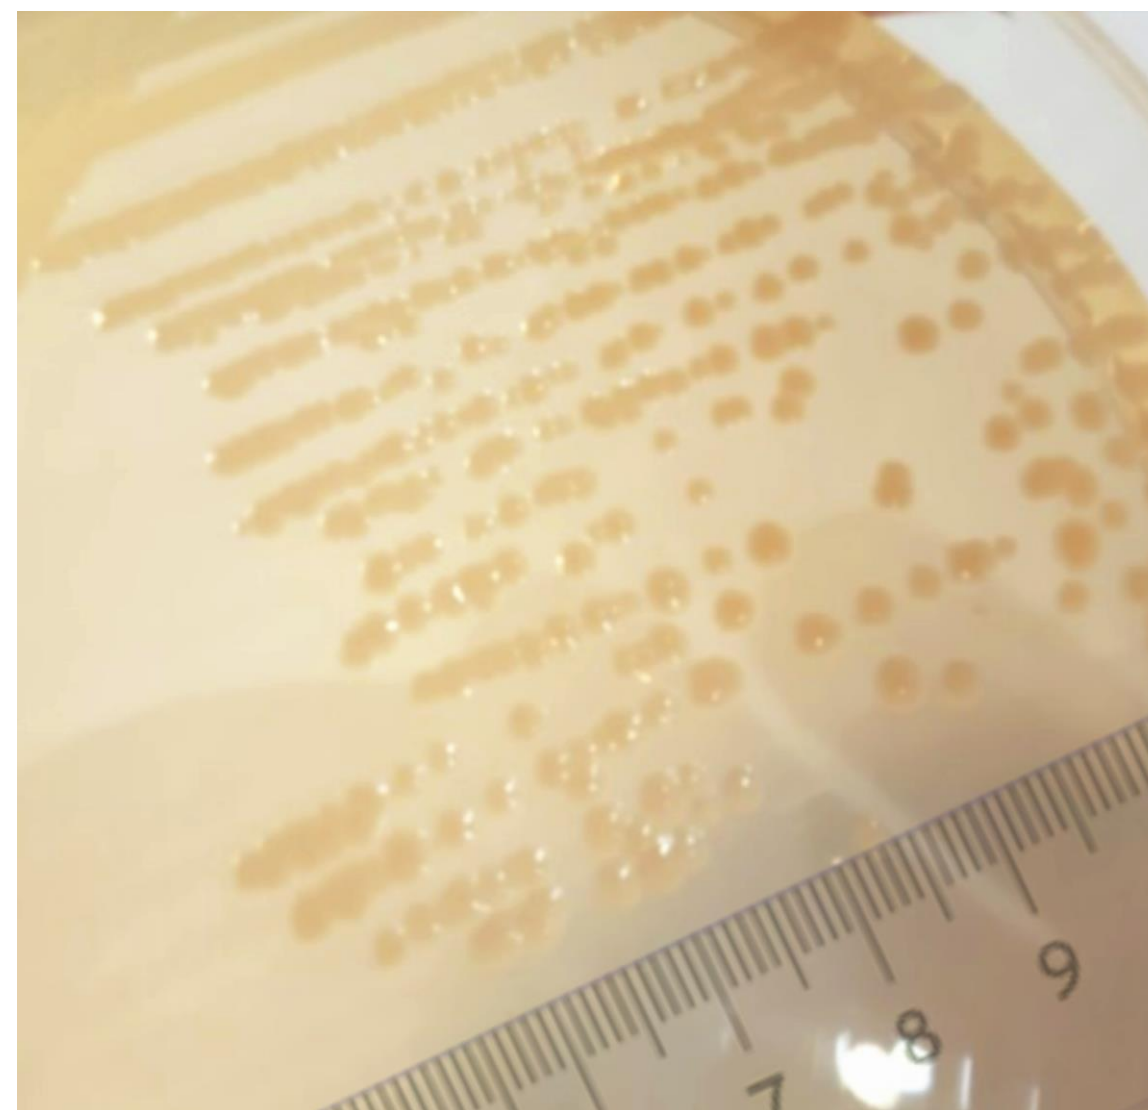

**Figure S6.** Electron microscopy of negatively-stained flagellated cells of strain JDS02PS016T in the exponential growth phase (left). Colony morphology of strain JDS02PS016T after incubation at 30 °C for 48 h on LB agar (right).



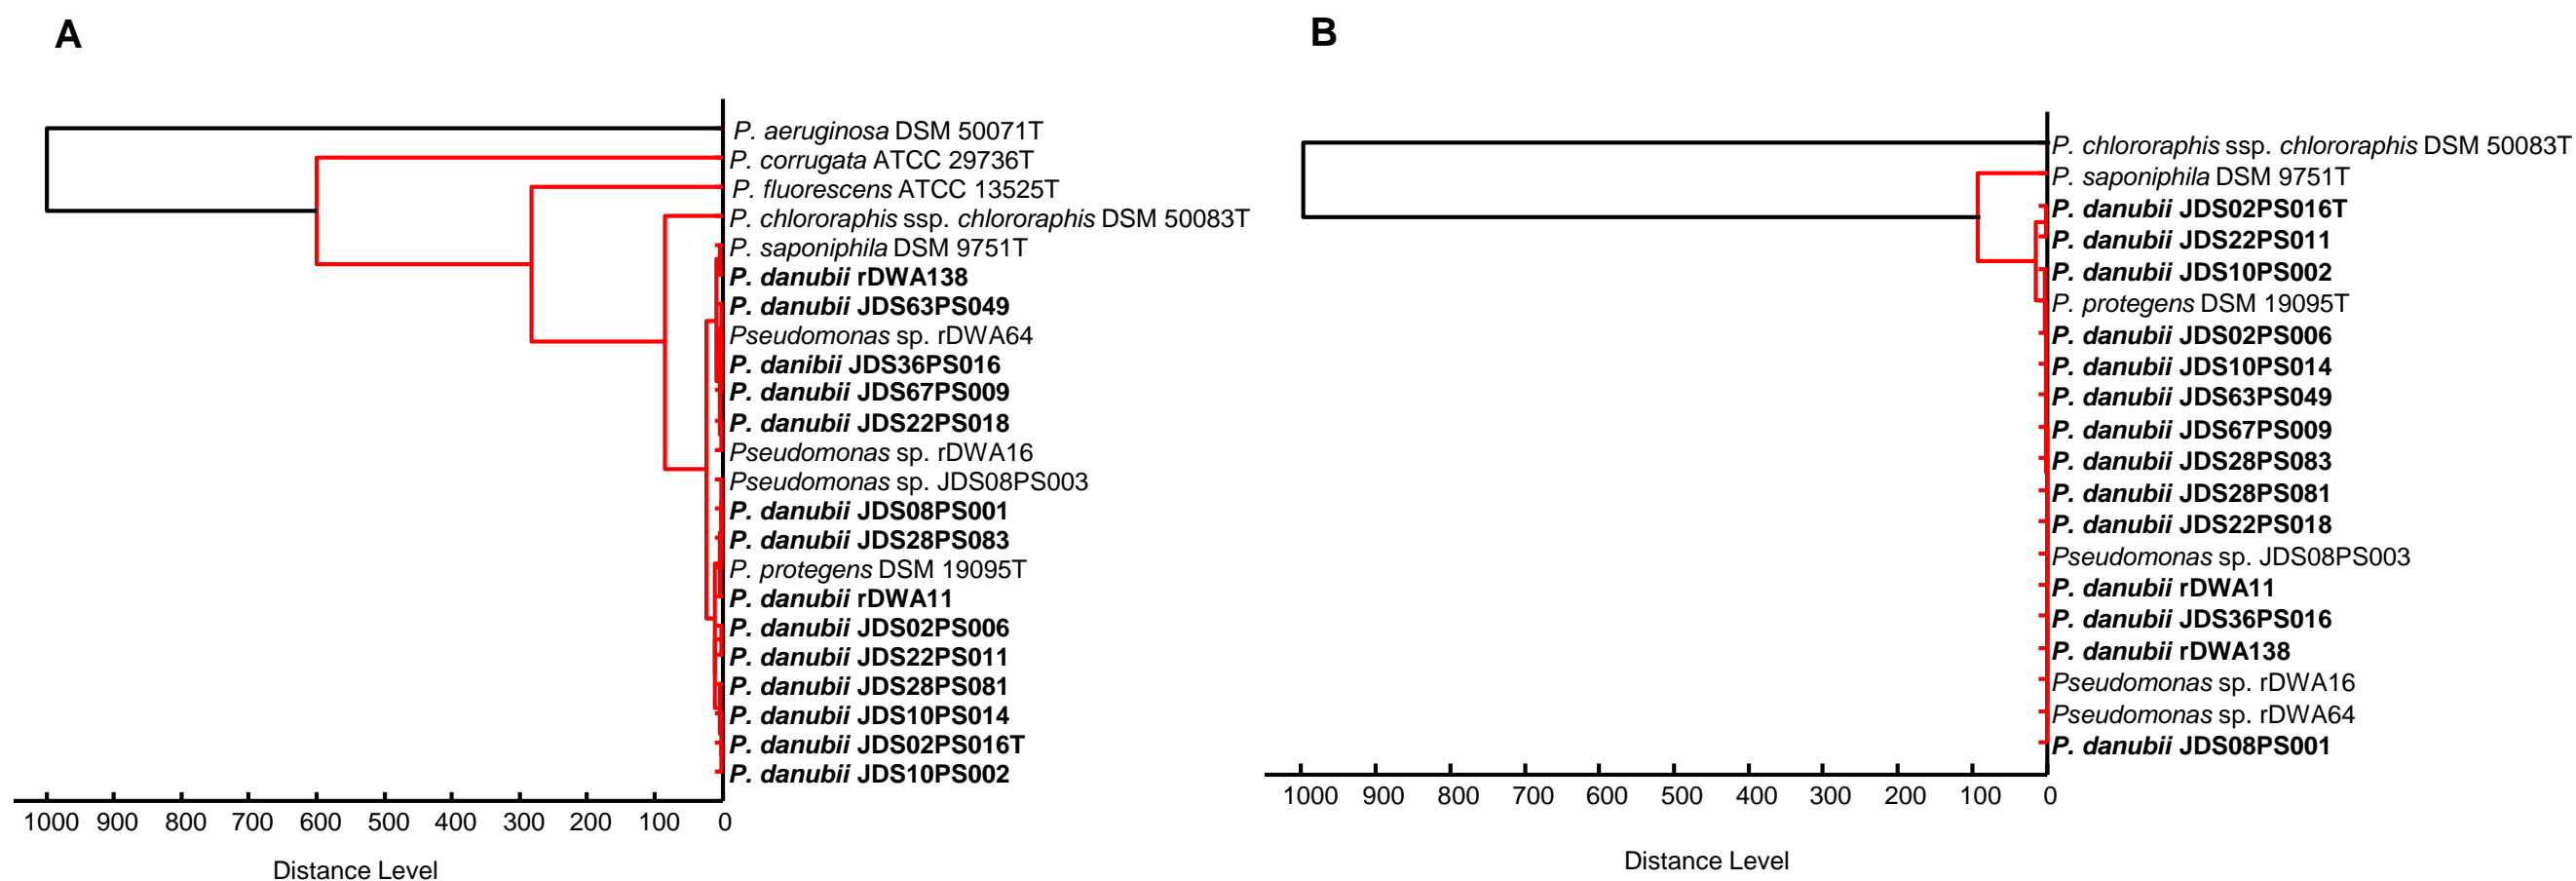

**Figure S7.** Dendrogram of the main proteins obtained by MALDI-TOF mass spectrometry. A) with outgroups; B) only species in the *P. chlororaphis* subgroup.
